# Supplementary material for: Rational Development and Characterization of a Ubiquitin Variant with Selectivity for Ubiquitin C-Terminal Hydrolase L3
Source: MDPI journal article supplement (doi:10.3390/biom12010062), 2022-01-01
Supplement: s1 [file s1]

# Rational Development and Characterization of a Ubiquitin Variant with Selectivity for Ubiquitin C-Terminal Hydrolase L3

Chad S. Hewitt <sup>1</sup>, Chittaranjan Das <sup>2</sup> and Daniel P. Flaherty <sup>1,3,4,\*</sup>

<sup>1</sup> Department of Medicinal Chemistry and Molecular Pharmacology, College of Pharmacy, 575 Stadium Mall Dr. West Lafayette, IN 47907; hewitt8@purdue.edu (C.S.H.), dflaher@purdue.edu (D.P.F.)

<sup>2</sup> Department of Chemistry, College of Science, 560 Oval Dr. West Lafayette, IN 47907; cdas@purdue.edu (C.D.)

<sup>3</sup> Purdue Center for Cancer Research, Hanson Life Sciences Research Building, 201 University St. West Lafayette, IN 47907

<sup>4</sup> Purdue Institute for Drug Discovery, 720 Clinic Ln. West Lafayette, IN 47907

\* Correspondence: dflaher@purdue.edu

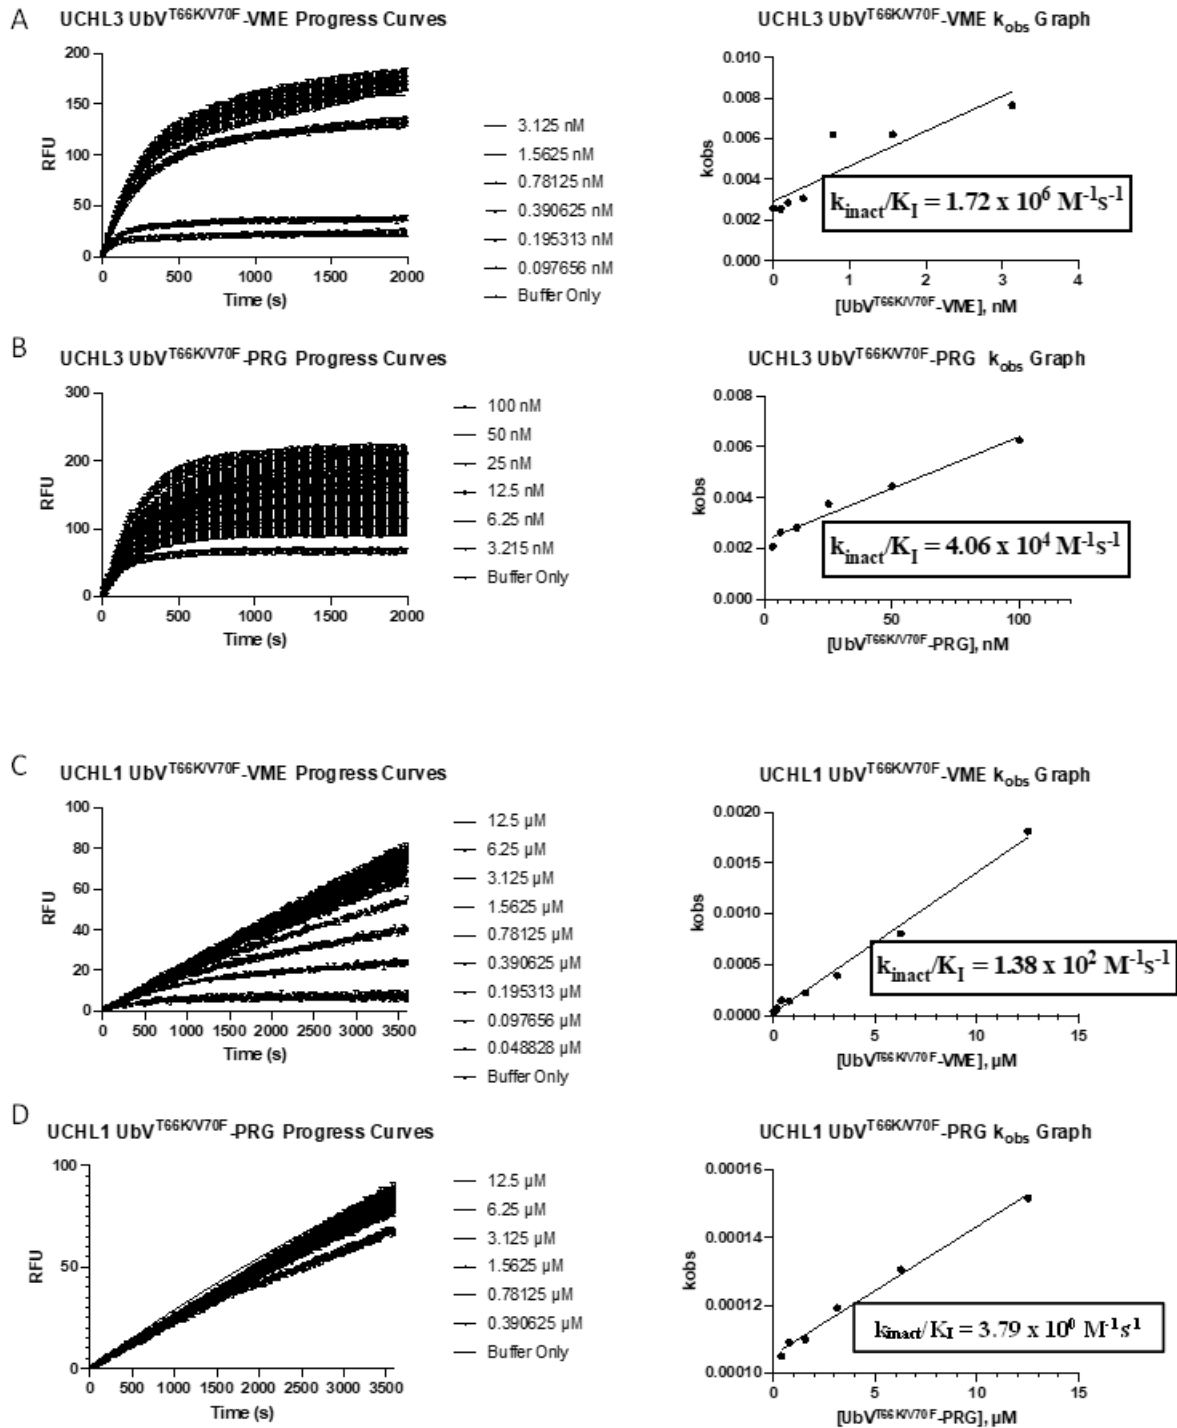

**Figure S1.** Progress Curves for UbV<sup>T66K/V70F</sup>-ABPs and linear fits  $k_{obs}$  vs [UbV-ABP] for against UCHL3 and UCHL1. **A)** UCHL3 with HA-UbV<sup>T66K/V70F</sup>-VME, **B)** UCHL3 with HA-UbV<sup>T66K/V70F</sup>-PRG, **C)** UCHL1 with HA-UbV<sup>T66K/V70F</sup>-VME, **D)** UCHL1 with HA-UbV<sup>T66K/V70F</sup>-PRG

**Table S1. BioLuminate PPI interaction analysis for Ub-UCHL3.**

| Ub Residue | Closest UCHL3 residue                                                                           | Distance                                                             | Specific Interactions                                            | # HB | # Salt Bridges | # Pi Stacking | # Disulfides | # vdW Clash | Surface Complementarity | Buried SASA |
|------------|-------------------------------------------------------------------------------------------------|----------------------------------------------------------------------|------------------------------------------------------------------|------|----------------|---------------|--------------|-------------|-------------------------|-------------|
| B:6:Lys    |                                                                                                 |                                                                      |                                                                  | 0    | 0              | 0             | 0            | 0           | 0.2                     | 23.60%      |
| B:7:Thr    | A:220:Leu                                                                                       | 3.7 A                                                                |                                                                  | 0    | 0              | 0             | 0            | 0           | 0.62                    | 93.30%      |
| B:8:Leu    | A:224:Ala<br>A:34:Val<br>A:37:Met<br>A:223:Asn<br>A:36:Gly<br>A:213:Met<br>A:222:Phe            | 3.4 A<br>3.4 A<br>3.5 A<br>3.7 A<br>3.8 A<br>3.9 A<br>4.0 A          |                                                                  | 0    | 0              | 0             | 0            | 0           | 0.78                    | 99.00%      |
| B:9:Thr    | A:220:Leu<br>A:222:Phe<br>A:213:Met                                                             | 3.4 A<br>3.5 A<br>3.9 A                                              |                                                                  | 0    | 0              | 0             | 0            | 0           | 0.85                    | 75.20%      |
| B:10:Gly   |                                                                                                 |                                                                      |                                                                  | 0    | 0              | 0             | 0            | 0           | 0                       | 2.10%       |
| B:11:Lys   | A:220:Leu                                                                                       | 3.7 A                                                                |                                                                  | 0    | 0              | 0             | 0            | 0           | 0.89                    | 14.70%      |
| B:13:Ile   |                                                                                                 |                                                                      |                                                                  | 0    | 0              | 0             | 0            | 0           | 0.6                     | 0.00%       |
| B:18:Glu   |                                                                                                 |                                                                      | 1x salt bridge to A:108:Lys                                      | 0    | 1              | 0             | 0            | 0           | 0                       | 0.00%       |
| B:27:Lys   |                                                                                                 |                                                                      |                                                                  | 0    | 0              | 0             | 0            | 0           | 0                       | 41.10%      |
| B:34:Glu   | A:220:Leu                                                                                       | 3.2 A                                                                |                                                                  | 0    | 0              | 0             | 0            | 0           | 0.81                    | 21.90%      |
| B:36:Ile   |                                                                                                 |                                                                      |                                                                  | 0    | 0              | 0             | 0            | 0           | 0.4                     | 53.10%      |
| B:38:Pro   |                                                                                                 |                                                                      |                                                                  | 0    | 0              | 0             | 0            | 0           | 0                       | 0.10%       |
| B:39:Asp   | A:156:Gln<br>A:157:Thr                                                                          | 2.9 A<br>3.3 A                                                       | 1x hb to A:156:Gln                                               | 1    | 0              | 0             | 0            | 0           | 0.83                    | 42.90%      |
| B:40:Gln   | A:157:Thr                                                                                       | 3.8 A                                                                |                                                                  | 0    | 0              | 0             | 0            | 0           | 0.9                     | 27.60%      |
| B:41:Gln   | A:156:Gln                                                                                       | 2.8 A                                                                | 1x hb to A:156:Gln                                               | 1    | 0              | 0             | 0            | 0           | 0.65                    | 100.00%     |
| B:42:Arg   | A:156:Gln<br>A:14:Glu                                                                           | 3.1 A<br>3.3 A                                                       | 1x hb, 1x salt bridge to A:14:Glu<br>1x hb to A:156:Gln          | 2    | 1              | 0             | 0            | 0           | 0.77                    | 58.40%      |
| B:44:Ile   | A:35:Tyr                                                                                        | 3.6 A                                                                |                                                                  | 0    | 0              | 0             | 0            | 0           | 0.71                    | 99.90%      |
| B:46:Ala   | A:44:Met                                                                                        | 4.0 A                                                                |                                                                  | 0    | 0              | 0             | 0            | 0           | 0                       | 10.00%      |
| B:47:Gly   | A:44:Met<br>A:35:Tyr                                                                            | 3.3 A<br>3.7 A                                                       |                                                                  | 0    | 0              | 0             | 0            | 0           | 0.8                     | 57.00%      |
| B:49:Gln   |                                                                                                 |                                                                      |                                                                  | 0    | 0              | 0             | 0            | 0           | 0.46                    | 21.70%      |
| B:68:Hie   | A:41:Leu<br>A:35:Tyr                                                                            | 3.5 A<br>3.9 A                                                       |                                                                  | 0    | 0              | 0             | 0            | 0           | 0.68                    | 74.50%      |
| B:69:Leu   |                                                                                                 |                                                                      |                                                                  | 0    | 0              | 0             | 0            | 0           | 0.07                    | 91.70%      |
| B:70:Val   | A:223:Asn<br>A:33:Asp<br>A:35:Tyr                                                               | 3.4 A<br>3.6 A<br>3.7 A                                              |                                                                  | 0    | 0              | 0             | 0            | 0           | 0.81                    | 96.80%      |
| B:71:Leu   | A:223:Asn<br>A:220:Leu                                                                          | 2.9 A<br>3.2 A                                                       | 1x hb to A:223:Asn                                               | 1    | 0              | 0             | 0            | 0           | 0.67                    | 98.00%      |
| B:72:Arg   | A:33:Asp<br>A:11:Ala<br>A:10:Glu<br>A:12:Asn<br>A:157:Thr<br>A:13:Pro<br>A:156:Gln<br>A:223:Asn | 2.8 A<br>3.1 A<br>3.4 A<br>3.4 A<br>3.6 A<br>3.6 A<br>3.8 A<br>4.0 A | 1x hb to A:11:Ala<br>2x hb, 1x salt bridge, 1x clash to A:33:Asp | 3    | 1              | 0             | 0            | 1           | 0.84                    | 99.70%      |

|           |                                                                                                                                                    |                                                                                                          |                                                                                                                                 |   |   |   |   |   |      |         |
|-----------|----------------------------------------------------------------------------------------------------------------------------------------------------|----------------------------------------------------------------------------------------------------------|---------------------------------------------------------------------------------------------------------------------------------|---|---|---|---|---|------|---------|
| B:73:Leu  | A:11:Ala<br>A:55:Leu<br>A:221:Arg<br>A:10:Glu<br>A:222:Phe<br>A:168:Leu                                                                            | 2.8 A<br>3.4 A<br>3.5 A<br>3.5 A<br>3.7 A<br>3.9 A                                                       | 1x hb to<br>A:11:Ala                                                                                                            | 1 | 0 | 0 | 0 | 0 | 0.87 | 98.10%  |
| B:74:Arg  | A:152:Ala<br>A:157:Thr<br>A:8:Pro<br>A:154:Glu<br>A:158:Glu<br>A:9:Leu<br>A:160:Pro<br>A:168:Leu<br>A:10:Glu<br>A:166:Val<br>A:159:Ala<br>A:55:Leu | 2.8 A<br>2.9 A<br>2.9 A<br>3.1 A<br>3.2 A<br>3.4 A<br>3.5 A<br>3.6 A<br>3.6 A<br>3.6 A<br>3.8 A<br>3.9 A | 1x hb to<br>A:8:Pro<br>1x salt bridge<br>to A:10:Glu<br>1x hb to<br>A:152:Ala<br>1x hb to<br>A:154:Glu<br>2x hb to<br>A:157:Thr | 5 | 1 | 0 | 0 | 0 | 0.87 | 91.30%  |
| B:75:Gly  | A:9:Leu<br>A:8:Pro<br>A:55:Leu<br>A:170:Phe<br>A:168:Leu<br>A:95:Cys                                                                               | 3.1 A<br>3.3 A<br>3.4 A<br>3.5 A<br>3.7 A<br>3.7 A                                                       | 1x hb to<br>A:9:Leu                                                                                                             | 1 | 0 | 0 | 0 | 0 | 0.9  | 100.00% |
| B:75A:Nma | A:168:Leu<br>A:166:Val<br>A:95:Cys<br>A:93:Asn<br>A:8:Pro                                                                                          | 3.0 A<br>3.4 A<br>3.4 A<br>3.5 A<br>3.8 A                                                                | 1x hb to<br>A:168:Leu                                                                                                           | 1 | 0 | 0 | 0 | 0 | 0.84 | 95.60%  |

**Table S2. BioLuminate PPI interaction analysis for Ub-UCHL1.**

| Residue  | Closest                                                                             | Distance                                                    | Specific Interactions      | # HB | # Salt Bridges | # Pi Stacking | # Disulfides | # vdW Clash | Surface Complementarity | Buried SASA |
|----------|-------------------------------------------------------------------------------------|-------------------------------------------------------------|----------------------------|------|----------------|---------------|--------------|-------------|-------------------------|-------------|
| B:6:Lys  | A:35:Glu                                                                            | 3.9 A                                                       | 1x salt bridge to A:35:Glu | 0    | 1              | 0             | 0            | 0           | 0.13                    | 34.10%      |
| B:7:Thr  | A:212:Val<br>A:32:Leu                                                               | 3.8 A<br>4.0 A                                              |                            | 0    | 0              | 0             | 0            | 0           | 0.5                     | 98.50%      |
| B:8:Leu  | A:31:Val<br>A:34:Leu<br>A:215:Ser<br>A:33:Gly<br>A:216:Ala<br>A:32:Leu<br>A:214:Phe | 3.4 A<br>3.4 A<br>3.5 A<br>3.6 A<br>3.6 A<br>3.7 A<br>3.9 A |                            | 0    | 0              | 0             | 0            | 0           | 0.84                    | 98.60%      |
| B:9:Thr  | A:214:Phe<br>A:205:Thr                                                              | 3.4 A<br>3.6 A                                              |                            | 0    | 0              | 0             | 0            | 0           | 0.82                    | 83.50%      |
| B:10:Gly |                                                                                     |                                                             |                            | 0    | 0              | 0             | 0            | 0           | 0.04                    | 16.10%      |
| B:11:Lys | A:212:Val                                                                           | 3.8 A                                                       |                            | 0    | 0              | 0             | 0            | 0           | 0.72                    | 24.80%      |
| B:13:Ile |                                                                                     |                                                             |                            | 0    | 0              | 0             | 0            | 0           | 0.77                    | 1.40%       |
| B:34:Glu | A:213:Arg<br>A:212:Val                                                              | 3.2 A<br>3.4 A                                              | 1x hb to A:213:Arg         | 1    | 0              | 0             | 0            | 0           | 0.85                    | 45.40%      |
| B:35:Gly | A:213:Arg                                                                           | 3.1 A                                                       | 1x hb to A:213:Arg         | 1    | 0              | 0             | 0            | 0           | 0.86                    | 16.60%      |
| B:36:Ile | A:213:Arg<br>A:212:Val                                                              | 3.5 A<br>3.8 A                                              |                            | 0    | 0              | 0             | 0            | 0           | 0.65                    | 100.00%     |
| B:37:Pro | A:154:Val<br>A:213:Arg                                                              | 3.7 A<br>3.9 A                                              |                            | 0    | 0              | 0             | 0            | 0           | 0.5                     | 79.40%      |
| B:39:Asp | A:153:Arg                                                                           | 3.5 A                                                       |                            | 0    | 0              | 0             | 0            | 0           | 0.73                    | 28.30%      |
| B:40:Gln | A:153:Arg<br>A:155:Asp                                                              | 3.4 A<br>3.6 A                                              |                            | 0    | 0              | 0             | 0            | 0           | 0.77                    | 97.50%      |
| B:42:Arg |                                                                                     |                                                             |                            | 0    | 0              | 0             | 0            | 0           | 0                       | 20.20%      |
| B:44:Ile |                                                                                     |                                                             |                            | 0    | 0              | 0             | 0            | 0           | 0.75                    | 60.10%      |
| B:47:Gly |                                                                                     |                                                             |                            | 0    | 0              | 0             | 0            | 0           | 0                       | 9.90%       |
| B:49:Gln |                                                                                     |                                                             |                            | 0    | 0              | 0             | 0            | 0           | 0                       | 3.10%       |
| B:68:His | A:32:Leu<br>A:38:Ser                                                                | 3.7 A<br>3.8 A                                              |                            | 0    | 0              | 0             | 0            | 0           | 0.58                    | 64.20%      |
| B:69:Leu |                                                                                     |                                                             |                            | 0    | 0              | 0             | 0            | 0           | 0.09                    | 93.10%      |
| B:70:Val | A:32:Leu<br>A:30:Asp                                                                | 3.5 A<br>3.9 A                                              |                            | 0    | 0              | 0             | 0            | 0           | 0.76                    | 93.00%      |
| B:71:Leu | A:215:Ser<br>A:212:Val<br>A:8:Ile<br>A:213:Arg<br>A:214:Phe                         | 2.9 A<br>3.5 A<br>3.9 A<br>3.9 A<br>3.9 A                   |                            | 0    | 0              | 0             | 0            | 0           | 0.87                    | 96.70%      |

|           |                                                                                     |                                                             |                                                                                                                                   |   |   |   |   |   |      |         |
|-----------|-------------------------------------------------------------------------------------|-------------------------------------------------------------|-----------------------------------------------------------------------------------------------------------------------------------|---|---|---|---|---|------|---------|
| B:72:Arg  | A:30:Asp<br>A:153:Arg<br>A:9:Asn<br>A:8:Ile<br>A:7:Glu<br>A:10:Pro                  | 2.8 A<br>2.9 A<br>3.2 A<br>3.2 A<br>3.4 A<br>3.7 A          | 1x hb to<br>A:8:Ile<br>1x clash to<br>A:9:Asn<br>2x hb, 1x salt<br>bridge, 1x<br>clash to<br>A:30:Asp<br>1x clash to<br>A:153:Arg | 3 | 1 | 0 | 0 | 3 | 0.86 | 97.00%  |
| B:73:Leu  | A:8:Ile<br>A:52:Leu<br>A:213:Arg<br>A:7:Glu<br>A:6:Met<br>A:215:Ser                 | 3.0 A<br>3.4 A<br>3.5 A<br>3.5 A<br>3.7 A<br>3.9 A          | 1x hb, 1x<br>clash to<br>A:8:Ile                                                                                                  | 1 | 0 | 0 | 0 | 1 | 0.82 | 100.00% |
| B:74:Arg  | A:155:Asp<br>A:151:Gln<br>A:160:Phe<br>A:156:Asp<br>A:6:Met<br>A:153:Arg<br>A:5:Pro | 3.0 A<br>3.2 A<br>3.4 A<br>3.5 A<br>3.5 A<br>3.9 A<br>3.9 A | 1x hb to<br>A:155:Asp                                                                                                             | 1 | 0 | 0 | 0 | 0 | 0.78 | 83.50%  |
| B:75:Gly  | A:6:Met<br>A:5:Pro<br>A:52:Leu<br>A:162:Phe<br>A:160:Phe<br>A:90:Cys                | 2.9 A<br>3.6 A<br>3.6 A<br>3.7 A<br>3.8 A<br>3.9 A          | 2x hb to<br>A:6:Met                                                                                                               | 2 | 0 | 0 | 0 | 0 | 0.8  | 100.00% |
| B:75A:Nma | A:160:Phe<br>A:90:Cys<br>A:88:Asn                                                   | 2.9 A<br>3.4 A<br>3.6 A                                     | 1x clash to<br>A:90:Cys<br>1x hb to<br>A:160:Phe                                                                                  | 1 | 0 | 0 | 0 | 1 | 0.65 | 91.60%  |

**Table S3. BioLuminate Residue Scanning Analysis at Gln40 for both Ub-UCHL3 and Ub-UCHL1**

| <b>Gln40(X); X =</b> | <b>Affinity<sup>UCHL3</sup><br/>(kcal/mol)</b> | <b>Stability<sup>UCHL3</sup><br/>(kcal/mol)</b> | <b>Affinity<sup>UCHL1</sup><br/>(kcal/mol)</b> | <b>Stability<sup>UCHL1</sup><br/>(kcal/mol)</b> |
|----------------------|------------------------------------------------|-------------------------------------------------|------------------------------------------------|-------------------------------------------------|
| <b>Ala</b>           | 1.0                                            | 3.6                                             | 6.9                                            | 0.2                                             |
| <b>Arg</b>           | -1.2                                           | -2.1                                            | -6.0                                           | 3.7                                             |
| <b>Asn</b>           | -0.3                                           | 3.1                                             | 4.1                                            | 3.0                                             |
| <b>Asp</b>           | 6.8                                            | 7.8                                             | 10.2                                           | 9.3                                             |
| <b>Cys</b>           | 0.0                                            | 5.7                                             | 4.4                                            | 2.4                                             |
| <b>Glu</b>           | 4.9                                            | -1.5                                            | 5.4                                            | -2.1                                            |
| <b>Gly</b>           | 1.7                                            | 11.5                                            | 7.9                                            | 8.0                                             |
| <b>Hid</b>           | -1.1                                           | -1.5                                            | 4.6                                            | 11.9                                            |
| <b>Hie</b>           | -0.7                                           | 3.9                                             | 3.4                                            | 16.3                                            |
| <b>Hip</b>           | -5.5                                           | 0.8                                             | 8.1                                            | 11.5                                            |
| <b>Ile</b>           | -1.0                                           | -8.7                                            | 1.5                                            | -6.6                                            |
| <b>Leu</b>           | -1.1                                           | -2.7                                            | 4.7                                            | 1.1                                             |
| <b>Lys</b>           | -0.9                                           | 13.4                                            | 7.6                                            | 17.6                                            |
| <b>Met</b>           | -2.0                                           | -11.3                                           | 0.2                                            | -11.1                                           |
| <b>Phe</b>           | -2.8                                           | 0.8                                             | 1.2                                            | -0.1                                            |
| <b>Pro</b>           | -0.2                                           | 31.1                                            | 3.8                                            | 32.2                                            |
| <b>Ser</b>           | 0.4                                            | 6.8                                             | 5.0                                            | 3.0                                             |
| <b>Thr</b>           | -0.1                                           | 1.4                                             | 5.0                                            | -1.6                                            |
| <b>Trp</b>           | -4.2                                           | 6.8                                             | 75.0                                           | 140                                             |
| <b>Tyr</b>           | -2.3                                           | 0.8                                             | 11.3                                           | 65.5                                            |
| <b>Val</b>           | -0.6                                           | -6.0                                            | 4.1                                            | -3.6                                            |

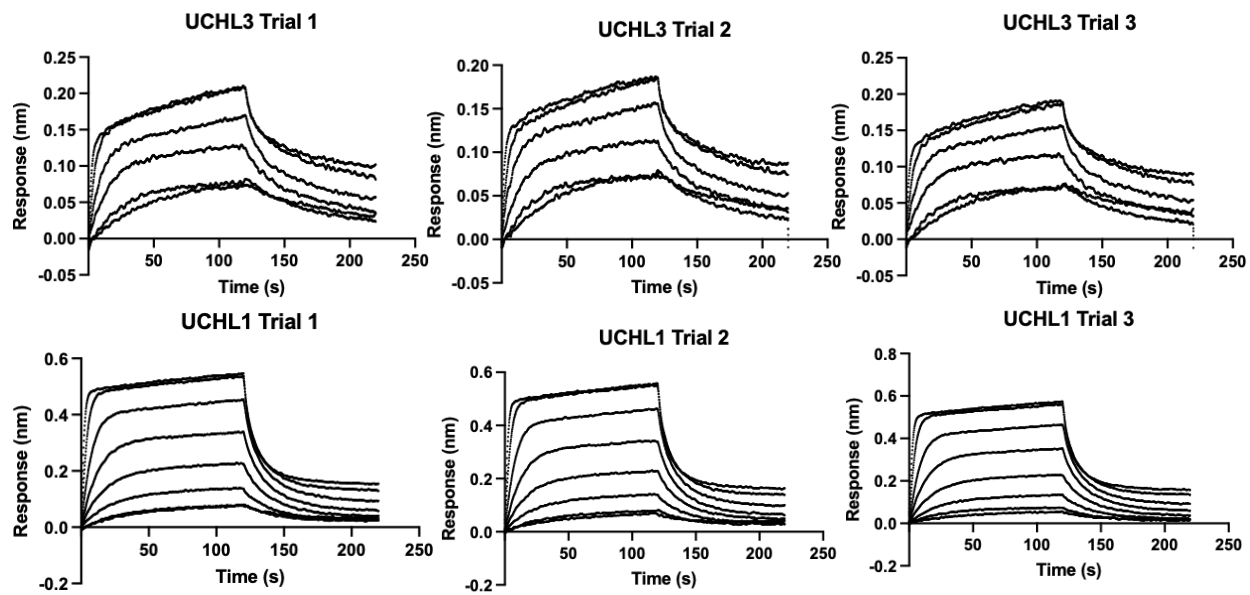

**Figure S2.** BLI association and dissociation curves for UbV<sup>Q40V/T66K/V70F</sup> against UCHL3 (**top row**) and UCHL1 (**bottom row**). The maximum response was plotted as a function of concentration of UbV to generate steady-state binding curves in main text.



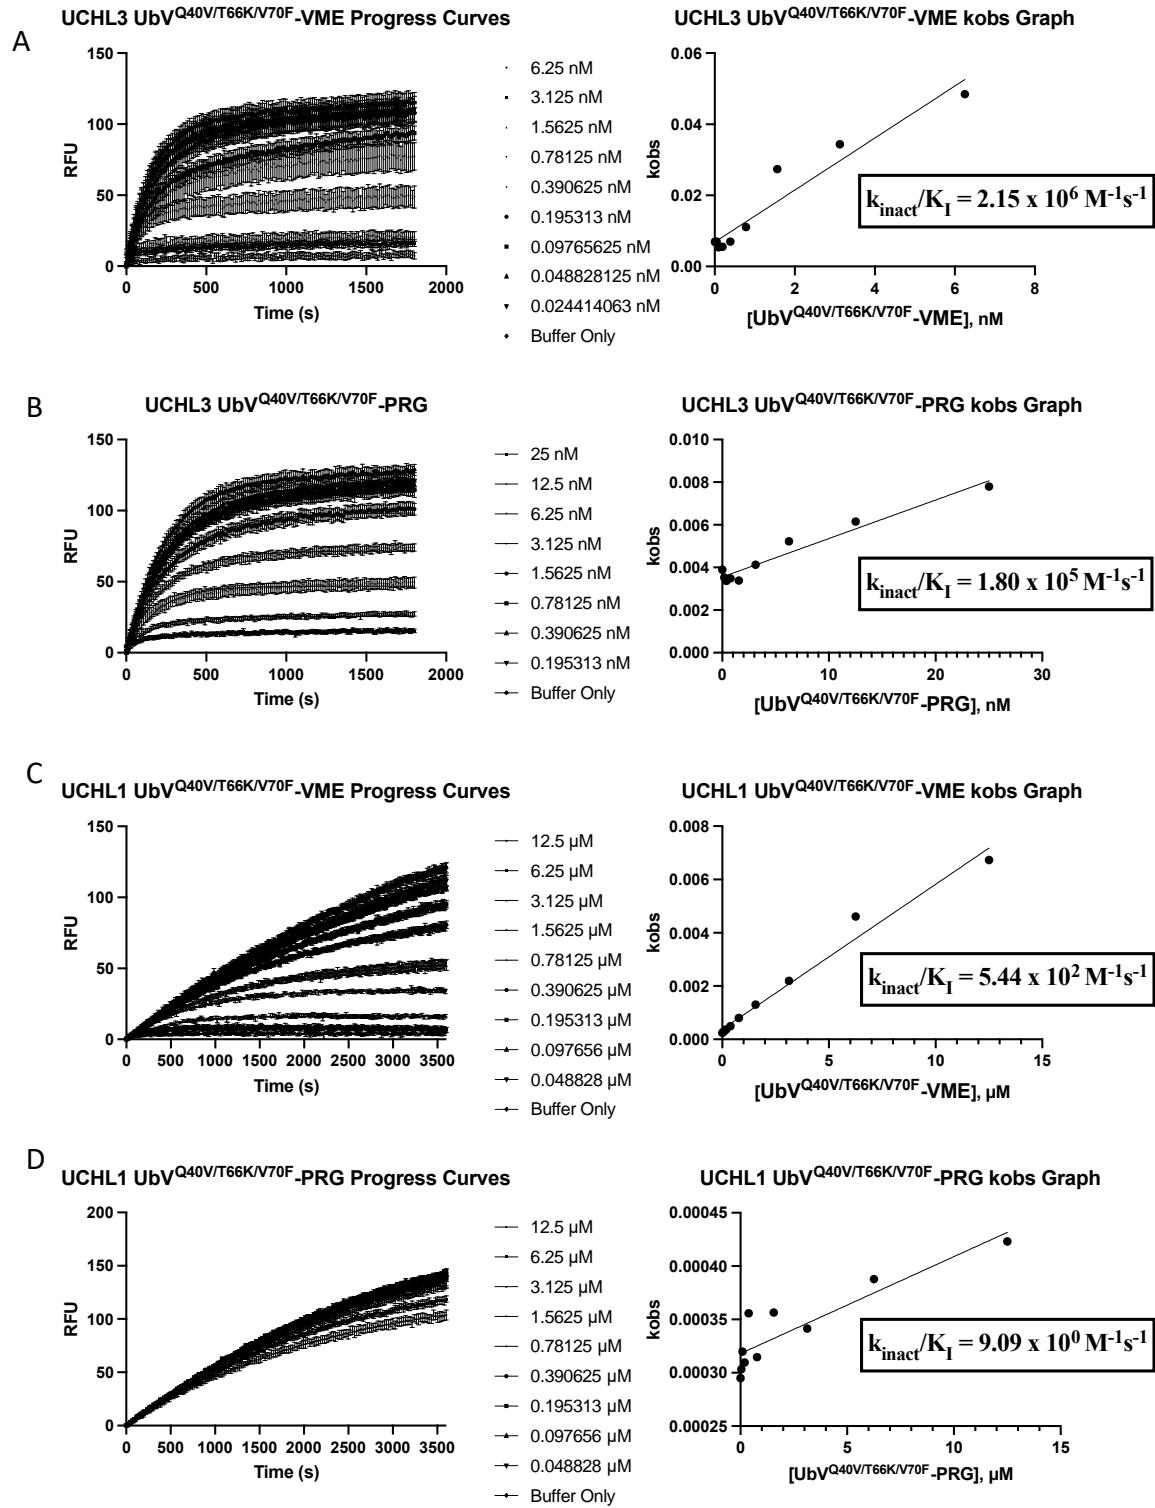

**Figure S3.** Progress Curves for UbV<sup>Q40V/T66K/V70F</sup>-ABPs and linear fits  $k_{\text{obs}}$  vs [UbV-ABP] against UCHL3 and UCHL1 with A) UCHL3 with HA-UbV<sup>Q40V/T66K/V70F</sup>-VME, B) UCHL3 with HA- UbV<sup>Q40V/T66K/V70F</sup>-PRG, C) UCHL1 with HA- UbV<sup>Q40V/T66K/V70F</sup>-VME, D) UCHL1 with HA- UbV<sup>Q40V/T66K/V70F</sup>-PRG
